# Supplementary material
Source: publisher figshare collection journal article supplement (https://acs.figshare.com/ndownloader/files/3603876)
Supplement: Supplementary file 1 [file 3603876]

**Supporting Information for**  
**Sequestering CO<sub>2</sub> for Short Term Storage in MOFs. Copolymer**  
**Synthesis with Oxiranes.**

Donald J. Darensbourg\*, Wan-Chun Chung, Kecheng Wang, and  
Hong-Cai Zhou

*Department of Chemistry, Texas A&M University, College Station, Texas 77843*

*djdarens@chem.tamu.edu*

| <b>Table of Contents</b>                                                                                                                                     | <b>Page</b> |
|--------------------------------------------------------------------------------------------------------------------------------------------------------------|-------------|
| <b>1. General information.....</b>                                                                                                                           | <b>2</b>    |
| <b>2. Preparation of HKUST-1.....</b>                                                                                                                        | <b>2</b>    |
| <b>3. Synthesis of salen cobalt catalyst, (S,S)-N,N'-bis(3,5-di-tert-butylsalicylidine)-<br/>1,2-cyclohexanediaminocobalt(III)-2,4-dinitrophenoxide.....</b> | <b>3</b>    |
| <b>4. Representative HKUST-1 CO<sub>2</sub> adsorbing process.....</b>                                                                                       | <b>3</b>    |
| <b>5. Representative Copolymerization of propylene oxide and CO<sub>2</sub> from HKUST-1.....</b>                                                            | <b>3</b>    |
| <b>6. Representative Copolymerization of propylene oxide and CO<sub>2</sub> without HKUST-1....</b>                                                          | <b>4</b>    |
| <b>7. Representative Copolymerization of <i>cis</i>-2-butylene oxide and CO<sub>2</sub> from HKUST-1... </b>                                                 | <b>4</b>    |
| <b>8. Representative Copolymerization of propylene oxide and<br/>CO<sub>2</sub> without refilling HKUST-1 with CO<sub>2</sub>.....</b>                       | <b>4</b>    |
| <b>References</b>                                                                                                                                            |             |

## EXPERIMENTAL SECTION

### 1. General information

All manipulations involving air- and/or water-sensitive compounds were carried out in a glove box under an argon atmosphere. 1, 3, 5-benzene-tricarboxylate (btc) and copper (II) nitrate hemipentahydrate were purchased from VWR International, LLC, and used as received. Propylene oxide (Alfa Aesar) and *cis*-2-butylene oxide (Alfa Aesar) were stirred over  $\text{CaH}_2$ , distilled, and stored in an argon-filled glovebox prior to use. Research Grade 99.999% carbon dioxide supplied in a high-pressure cylinder and equipped with a liquid dip tube was purchased from Airgas. The  $\text{CO}_2$  was further purified by passing through two steel columns packed with 4 Å molecular sieves that had been dried under vacuum at  $\geq 200^\circ\text{C}$ . Powder X-ray diffraction (PXRD) was carried out with a BRUKER D8-Focus Bragg–Brentano X-ray powder diffractometer equipped with a Cu sealed tube ( $\lambda = 1.54178$ ) at 40 kV and 40 mA. Gas adsorption measurements were conducted using a Micromeritics ASAP 2420 system at various temperatures. High pressure stainless steel reactors were dried at  $170^\circ\text{C}$  for 6 h before use.

### 2. Preparation of HKUST-1

We modified the approach reported by Roswell and Yaghi<sup>1</sup>:  $\text{Cu}(\text{NO}_3)_2 \cdot 2.5\text{H}_2\text{O}$  (600 mg), BTC (300 mg) in 15 mL of solvent (DMF: deionized  $\text{H}_2\text{O}$ : EtOH=1:1:1) were ultrasonically dissolved in a Pyrex vial, followed by the addition of 0.7 ml of nitric acid. The mixture was heated at  $85^\circ\text{C}$  in an oven overnight. After cooling down to room temperature, cubic dark blue crystals were harvested by filtration. The product was soaked in anhydrous methanol and dichloromethane for three days respectively, during which the solvent was decanted and replenished several times. Finally, the solvent was removed under vacuum at  $150^\circ\text{C}$  for 12 h.

### 3. Synthesis of salen cobalt catalyst, (S,S)-N,N'-bis(3,5-di-tert-butylsalicylidine)-1,2-cyclohexanediaminocobalt(III)-2,4-dinitrophenoxide

This complex was synthesized following the literature procedure.<sup>2</sup> (S,S)-N,N'-bis(3,5-di-tert-butylsalicylidine)-1,2-cyclohexanediaminocobalt(II) (0.500 g, 0.828 mmol, 1 eq) and 2,4-dinitrophenol (0.152 g, 0.828 mmol, 1 eq) were dissolved in dichloromethane. After bubbling oxygen for one day, the solvent was reduced *in vacuo* followed by recrystallization with hexane. The resulting solid was dried *in vacuo* overnight. The yield was 0.596 g (0.757 mmol) or 91.4%. MS for M-(2,4-dinitrophenoxide):  $m/z = 603.3338$ .

### 4. Representative HKUST-1 CO<sub>2</sub> adsorbing process.

A 14 mL high pressure reactor was filled with HKUST-1 (6.1 g) to the top, and was pressurized to 9 bar. After 7 minutes, the pressure decreased to lower than 2 bar and the reactor was pressurized again to 7 bar. After 9 minutes the pressure decreased again and it was released until being stabilized at 1.4 bar.

### 5. Representative Copolymerization of propylene oxide and CO<sub>2</sub> from HKUST-1.

The HKUST-1 (with CO<sub>2</sub>) reactor was heated to 120 °C for 30 minutes. And it was subsequently connected to the 14 mL reaction reactor which contained salen cobalt catalyst (5.6 mg, 7.1 μmol, 1 eq), PPNDNP cocatalyst (5.2 mg, 7.1 μmol, 1 eq) and propylene oxide (1.00 mL, 14.3 mmol, 2000 eq). The connector was open for 20 seconds to let CO<sub>2</sub> transfer from HKUST-1 to reaction, and the remaining CO<sub>2</sub> in the HKUST-1 vessel was released to the atmosphere. After being stirred at ambient temperature for 5 h, the copolymer reactor was put in an ice bath for ten minutes and opened to air, and the NMR spectrum of the crude mixture was taken. The crude reaction mixture was dissolved in CH<sub>2</sub>Cl<sub>2</sub> and added to about 1 M HCl/methanol solution to quench the reaction and precipitate the copolymer. The supernatant

HCl/methanol solution was removed and the polymer precipitate was re-dissolved in dichloromethane and reprecipitated from methanol. The resulting copolymer was obtained by removing the supernatant and subsequently dried *in vacuo* at 40 °C for further analysis by GPC and DSC. The whole CO<sub>2</sub> adsorbing-releasing and copolymerization process was repeated ten times to test the sustainability of HKUST-1 of undergoing CO<sub>2</sub> adsorbing-desorbing cycles.

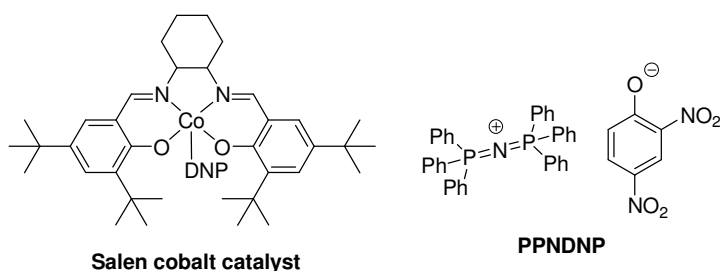

## 6. Representative Copolymerization of propylene oxide and CO<sub>2</sub> without HKUST-1

The whole process of copolymerization of propylene oxide and CO<sub>2</sub> was repeated except pressurizing an empty high pressure reactor without HKUST-1 to 24 bar thirty minutes before transferring.

## 7. Representative Copolymerization of *cis*-2-butylene oxide and CO<sub>2</sub> from HKUST-1.

The CO<sub>2</sub> adsorbing process and copolymerization of propylene oxide and CO<sub>2</sub> were repeated except using a bifunctional salen chromium catalyst (4.9 mg, 5.7 μmol, 1 eq) and *cis*-2-butylene oxide (0.50 mL, 5.7 mmol, 1000 eq).

## 8. Representative Copolymerization of propylene oxide and CO<sub>2</sub> without refilling HKUST-1 with CO<sub>2</sub>.

The same process as mentioned before was repeated six times, except only carrying out CO<sub>2</sub> adsorbing process once at the beginning.

## REFERENCE:

1. Rowsell, J. L. C.; Yaghi, O. M. *J. Am. Chem. Soc.* **2006**, *128*, 1304-1315.
2. Lu, X.-B.; Shi, L.; Wang, Y.-M.; Zhang, R.; Zhang, Y.-J.; Peng, X.-J.; Zhang Z.-C.; Li, B. *J. Am. Chem. Soc.* **2006**, *128*, 1664-1674.
